# Supplementary material for: Efficacy of Immunization against a Novel Synthetic 13-Amino Acid Betaglycan-Binding Peptide Sequence of Inhibin α Subunit on Promoting Fertility in Female Rats
Source: MDPI journal article supplement (doi:10.3390/ijms24086914), 2023-04-07
Supplement: s1 [file s1]

**Table S1.** RT-PCR Primer sequences for tissue genes.

| Gene        | Genbank accession<br>no. | Primer sequence (5'-3')                               | Amplification<br>length (bp) |
|-------------|--------------------------|-------------------------------------------------------|------------------------------|
| Tgfr3       | XM_039091792.1           | F: CGGCTTTGGAAAAGAGAGTG<br>R: CAGGAGGAATGGTGTGGACT    | 215                          |
| Smad3       | XM_039080898.1           | F: TGGACGCAGGTTCTCCAAAC<br>R: CCGGCTCGCAGTAGGTAAC     | 90                           |
| Smad4       | XM_032886206.1           | F: GGCTGGTCGGAAAGGATT<br>R: GTGGGTAAGGATGGCTGT        | 270                          |
| Foxl2       | XM_003750571.5           | F: TCGCTAAGTTCCCGTTCTAC<br>R: GTAATTGCCCTTCTCGAACA    | 176                          |
| Fsh $\beta$ | NM_001007597.2           | F: CATCCTACTCTGGTGCTT<br>R: CACTCTTCCTTCTCTACTGA      | 84                           |
| Tgfr3l      | NM_001401205.1           | F: CCTGACACCAGTGCCTTTGA<br>R: CTAGGGGACGACGAGGTAT     | 156                          |
| Gnrhr       | XM_032916489.1           | F: TCTGCAATGCCAAAATCATC<br>R: GTAGGGAGTCCAGCAGATGAC   | 164                          |
| Lh $\beta$  | XM_032893648.1           | F: CTTCTCCTTCTCTGATGC<br>R: TTTATTGGGAGGGATGGT        | 80                           |
| Cga         | XM_032890134.1           | F: CACTCTGGCATTCCCATTA<br>R: GCCAGGTCCAAGAAGACAAT     | 108                          |
| Fshr        | NM_199237.2              | F: GAATGATGTCTTGGAAGTAATAG<br>R: CTTAATGCCTGTGTGGA    | 163                          |
| Lhcgr       | XM_039111807.1           | F: TTACACATAACCACCATACC<br>R: TCCAGCGAGATTAGAGTC      | 134                          |
| Star        | NM_031558.3              | F: TTGGGCATACTCAACAACCA<br>R: ATGACACCGCTTTGCTCAG     | 389                          |
| Cyp11a1     | XM_039080972.1           | F: GGAGACATGGCCAAGATGGTA<br>R: TGATGCTGGCTTTGAGGAGTG  | 52                           |
| Hsd3b1      | XM_032897642.1           | F: TGAAAAATGGTGGCACACTGC<br>R: TATAGTTGTAAATGGACGCAGC | 414                          |
| Cyp17a1     | NM_012753.3              | F: ACTGAGGGTATCGTGGATGC<br>R: TCGAACTTCTCCCTGCACTT    | 161                          |
| Cyp19a1     | NM_017085.3              | F: TCCTCCTGATTCGGAATTGTG<br>R: GGCCCGATTCCCAGACA      | 70                           |
| Creb        | XM_039084249.1           | F: CCAAACCTAGCAGTGGGCAGT<br>R: GAATGGTAGTACCCGGCTGA   | 140                          |
| Wnt2        | XM_575397.8              | F: TGGACAGCTGCGAAGTTATG<br>R: TGGACAGCTGCGAAGTTATG    | 263                          |
| Amh         | NM_012902.2              | F: GGAGAGACTGGGGAACAGC<br>R: CAAGAGCTGAGGCTCCCATTA    | 69                           |
| Ccnd2       | NM_022267.2              | F: CAGAAGGACATCCAGCCGTAC<br>R: TCGGGACTCCAGCCAAGAA    | 136                          |

|               |                |                                                        |     |
|---------------|----------------|--------------------------------------------------------|-----|
| Inh $\alpha$  | XM_032901415.1 | F: GCCTTGGTCTCCTGCA<br>R: ACGCGTAGGGACCTCATGCTCC       | 300 |
| Inh $\beta$ A | XM_008771712.3 | F: TGGAGTGTGATGGCAAGGTC<br>R: AGCCACACTCCTCCACAATC     | 339 |
| Inh $\beta$ B | NM_080771.2    | F: TCTTCATCGACTTTCGGCTCAT<br>R: TGTCAGGCGCAGCCACACTCCT | 304 |
| Gapdh         | XM_039097380.1 | F: GGCAAGTTCAATGGCACAGT<br>R: TGGTGAAGACGCCAGTAGACTC   | 151 |

---

*Abbreviations:* *Tgfr3*, TGF $\beta$  receptor 3; *Smad3*, SMAD family member 3; *Smad4*, SMAD family member 4; *Foxl2*, forkhead box L2; *Fshb*, follicle-stimulating hormone beta subunit; *Tgfr3l*, TGF $\beta$  receptor type III-like; *Lhb*, luteinizing hormone beta subunit; *Cga*, glycoprotein hormones, alpha polypeptide; *Fshr*, follicle-stimulating hormone receptor; *Lhcgr*, luteinizing hormone receptor; *Star*, steroidogenic acute regulatory protein; *Cyp11a1*, cytochrome P450 family 11 subfamily A member 1; *Hsd3 $\beta$ 1*, 3beta-hydroxysteroid dehydrogenase type 1; *Cyp17a1*, cytochrome P450 family 17 subfamily A member 1; *Cyp19a1*, cytochrome P450 family 19 subfamily A member 1 (aromatase); *Creb*, cAMP response element-binding protein; *Wnt2*, wingless-type MMTV integration site family, member 2; *Amlh*, anti-Mullerian hormone; *Cnd2*, cyclin D2; *Inha*, inhibin a; *Inh $\beta$ A*, inhibin beta subunit A; *Inh $\beta$ B*, inhibin beta subunit B; *Gapdh*, glyceraldehyde-3-phosphate dehydrogenase.

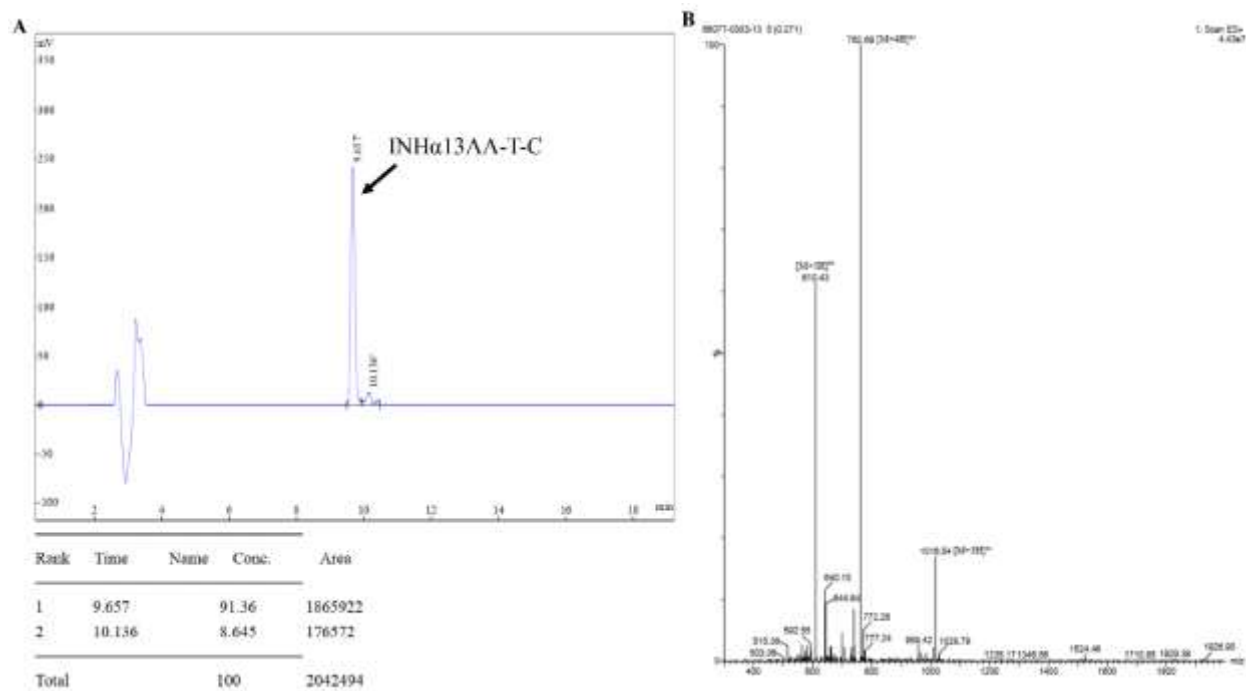

**Figure S1.** High-performance liquid chromatography (HPLC) purification of INH $\alpha$ 13AA-T-C peptide. **(A)** According to the peak area, the purity of INH $\alpha$ 13AA-T-C peptide was equal to 91.36%. **(B)** Identification of INH $\alpha$ 13AA-T-C peptide using ESI-MS.
